# Supplementary material for: Mapping protein binding sites by photoreactive fragment pharmacophores
Source: Research Square preprint supplement (doi:10.21203/rs.3.rs-3379575/v1), 2023-10-17
Supplement: Supplementary file 1 [file a2e74391bb8b09826cb09d16.xlsx]

## Sheet: Contents
Supplementary data Mapping protein binding sites by photoreactive fragment pharmacophores Péter Ábrányi-Balogh§, Dávid Bajusz§, Zoltán Orgován§, Aaron B. Keeley, László Petri, Nikolett Péczka, Tibor Viktor Szalai, Gyula Pálfy, Márton Gadanecz, Emma K. Grant, Tímea Imre, Tamás Takács, Ivan Ranđelović, Marcell Baranyi, András Marton, Gitta Schlosser, Qirat F. Ashraf, Elvin de Araujo, Tamás Karancsi…
Table of contents
PhP	List of compounds in the PhP library with experimental hit status and pharmacophore fingerprints
PhP – images	SMILES strings and 2D structures of the fragments as images
Crystallographic data	PDB ID and crystallographic information of the co-crystallized fragment-BRD4 complex

## Sheet: PhP
Title	BRD4-BD1	KRAS-G12D	STAT5B-NTD	AA_0	AA_1	AAD_0	AAD_1	AAD_2	AAH_0	AAH_1	AAN_0	AAN_1	AAN_2	AAR_0	AAR_1	AD_0	AD_1	AD_2	ADD_0	ADD_1	ADD_2	ADD_3	ADN_0	ADN_1	ADN_2	ADP_0	ADP_1	ADR_0	ADR_1	ADR_2	ADR_3	AH_0	AH_1	AHH_0	AHH_1	AHN_0	AHN_1	AHN_2	AHP_0	AHR_0	AHR_1	AN_0	AN_1	ANN_0	ANR_0	ANR_1	ANR_2	ANR_3	AP_0
PhP001	0	0	0	0	0	1	0	1	0	1	0	0	0	1	0	0	0	0	1	1	0	0	0	0	0	0	0	1	0	0	0	0	0	0	0	0	0	0	0	1	0	0	0	0	0	0	0	0	0
PhP002	0	0	0	0	0	0	0	0	1	0	0	0	0	1	0	0	0	0	0	0	0	0	0	0	0	0	0	0	0	0	0	0	0	0	1	0	0	0	1	1	1	0	0	0	0	0	0	0	0
PhP003	0	0	0	0	0	0	0	0	0	0	0	0	0	0	0	0	0	0	0	0	0	0	0	0	0	0	0	0	0	0	0	0	0	1	0	0	0	0	0	0	0	0	0	0	0	0	0	0	0
PhP004	0	0	0	0	0	0	0	0	0	0	0	0	0	0	0	0	0	0	0	0	0	0	0	0	0	0	0	0	0	0	0	0	0	0	0	0	0	0	0	0	0	0	0	0	0	0	0	0	0
PhP005	0	0	0	0	0	0	0	0	1	0	0	0	0	1	0	0	0	0	0	0	0	0	0	0	0	0	0	0	0	0	0	0	0	0	0	0	0	0	0	0	0	0	0	0	0	0	0	0	0
PhP006	0	0	0	0	0	0	0	0	0	0	0	0	0	0	1	0	0	0	0	0	0	0	0	0	0	0	0	0	0	0	0	0	0	0	0	0	0	0	0	1	1	0	0	0	0	0	0	0	0
PhP007	0	0	0	1	1	0	0	0	0	0	0	0	0	0	0	0	0	0	0	0	0	0	0	0	0	0	0	0	0	0	0	0	0	0	0	0	0	0	0	0	0	0	0	0	0	0	0	0	0
PhP008	0	0	0	0	0	0	0	0	0	0	0	0	0	0	0	0	0	0	0	0	0	0	0	0	0	0	0	0	0	0	0	0	0	0	0	0	0	0	0	1	1	0	0	0	0	0	0	0	0
PhP009	0	0	0	0	0	0	0	0	0	0	0	0	0	0	0	1	0	0	0	0	0	0	0	0	0	0	0	0	0	0	0	0	0	1	0	0	0	0	0	0	0	0	0	0	0	0	0	0	0
PhP010	0	0	0	0	0	0	0	0	0	0	0	0	0	0	0	0	0	0	0	1	0	0	0	0	0	1	1	0	0	1	0	0	0	0	0	0	0	0	1	0	0	0	0	0	0	0	0	0	0
PhP011	0	0	0	0	0	0	1	0	0	0	0	0	0	0	1	0	0	0	1	1	1	1	0	0	0	0	0	1	1	1	0	0	0	0	0	0	0	0	0	0	0	0	0	0	0	0	0	0	0
PhP012	0	0	0	0	0	0	0	0	0	0	0	0	0	0	0	0	0	0	0	0	0	0	0	0	0	0	0	0	0	0	0	0	0	0	0	0	0	0	0	0	0	0	0	0	0	0	0	0	0
PhP013	0	0	0	0	0	0	0	0	0	0	0	0	0	0	0	0	0	0	0	0	0	0	0	0	0	0	0	0	0	0	0	0	0	0	0	0	0	0	0	1	0	0	0	0	0	0	0	0	0
PhP014	0	0	0	1	0	0	0	0	0	0	0	0	0	0	0	0	0	0	0	0	0	0	0	0	0	0	0	0	1	0	0	0	0	0	0	0	0	0	0	0	0	0	0	0	0	0	0	0	0
PhP015	0	0	0	0	0	1	0	0	1	0	0	0	0	0	0	0	0	0	0	0	0	0	0	0	0	0	0	0	0	0	0	0	0	0	1	0	0	0	0	0	0	0	0	0	0	0	0	0	0
PhP016	0	0	0	0	0	0	0	0	0	0	0	0	0	0	0	0	0	0	0	0	0	0	0	0	0	0	0	0	0	0	0	1	0	0	0	0	0	0	0	0	0	0	0	0	0	0	0	0	0
PhP017	0	0	0	0	0	0	0	0	0	0	0	0	0	0	0	0	0	0	0	0	0	0	0	0	0	0	0	0	0	0	0	0	0	0	0	0	0	0	0	0	1	0	0	0	0	0	0	0	0
PhP018	0	0	0	0	0	0	0	0	1	1	0	0	0	1	1	0	0	0	0	0	0	0	0	0	0	0	0	0	0	0	0	0	0	0	1	0	0	0	0	1	1	0	0	0	0	0	0	0	0
PhP019	0	0	0	0	0	0	0	0	0	1	0	0	0	0	0	0	0	0	0	0	0	0	0	0	0	0	0	0	0	0	0	0	0	0	0	0	0	0	0	1	0	0	0	0	0	0	0	0	0
PhP020	0	0	0	0	0	0	0	0	0	0	0	0	0	0	0	0	0	0	0	0	0	0	0	0	0	0	0	0	0	0	0	0	0	1	0	0	0	0	0	1	1	0	0	0	0	0	0	0	0
PhP021	0	0	0	0	0	0	0	0	0	0	0	0	0	0	0	0	0	0	0	0	0	0	0	0	0	0	0	0	0	0	0	0	0	1	0	0	0	0	0	0	0	0	0	0	0	0	0	0	0
PhP022	0	0	0	0	0	0	0	0	0	0	0	0	0	0	0	0	0	0	0	0	0	0	0	0	0	0	0	0	0	0	0	0	1	1	0	0	0	0	0	0	0	0	0	0	0	0	0	0	1
PhP023	0	0	0	0	0	0	0	0	0	0	0	0	0	0	0	1	0	0	0	0	0	0	0	0	0	0	0	0	0	0	0	0	0	0	1	0	0	0	0	1	1	0	0	0	0	0	0	0	0
PhP024	0	0	0	0	0	0	0	0	1	1	0	0	0	1	0	0	0	0	0	0	0	0	0	0	0	0	0	0	0	0	0	0	0	0	1	0	0	0	0	1	0	0	0	0	0	0	0	0	0
PhP025	0	0	0	0	0	1	0	0	1	0	0	0	0	1	0	0	0	0	0	0	0	0	0	0	0	0	0	1	0	0	0	0	0	0	0	0	0	0	0	1	1	0	0	0	0	0	0	0	0
PhP026	0	0	0	0	0	0	0	0	0	0	0	0	0	0	0	0	0	0	0	0	0	0	0	0	0	0	0	0	0	0	0	0	0	0	0	0	0	0	0	1	0	0	0	0	0	0	0	0	0
PhP027	0	0	0	0	0	0	0	0	0	0	0	0	0	0	0	1	0	0	0	0	0	0	0	0	0	0	0	0	0	0	0	0	0	0	1	0	0	0	0	1	0	0	0	0	0	0	0	0	0
PhP028	0	0	0	0	0	0	0	0	0	0	0	0	0	0	0	0	0	0	0	0	0	0	0	0	0	0	0	1	0	0	0	0	0	0	0	0	0	0	0	0	1	0	0	0	0	0	0	0	0
PhP029	0	0	0	0	0	0	0	1	1	0	1	0	0	1	0	0	0	0	0	0	0	0	0	0	0	1	0	0	0	0	0	0	0	0	0	0	1	0	0	0	1	0	0	0	0	0	0	0	0
PhP030	0	0	0	0	0	0	0	0	0	0	0	0	0	0	0	1	0	0	0	0	0	0	0	0	0	0	0	0	0	0	0	0	0	0	1	0	0	0	0	1	0	0	0	0	0	0	0	0	0
PhP031	0	0	0	0	0	0	0	0	0	0	0	0	0	0	0	1	0	0	0	0	0	0	0	0	0	0	0	0	0	0	0	1	0	0	0	0	0	0	0	0	0	0	0	0	0	0	0	0	0
PhP032	0	0	0	0	0	0	0	0	0	0	0	0	0	0	0	0	0	0	0	0	0	0	0	0	0	0	0	0	0	0	0	0	0	1	0	0	0	0	0	1	1	0	0	0	0	0	0	0	0
PhP033	0	0	0	0	0	0	0	0	0	0	0	0	0	0	0	0	0	0	0	0	0	0	0	0	0	0	0	0	0	0	0	0	1	0	0	0	0	0	0	0	0	0	0	0	0	0	0	0	0
PhP034	0	0	0	0	0	0	0	0	0	0	0	0	0	0	0	0	0	0	0	0	0	0	0	0	0	0	0	0	0	0	0	0	0	0	0	0	0	0	0	1	1	0	0	0	0	0	0	0	0
PhP035	0	0	0	0	0	1	0	0	1	0	0	0	0	1	0	0	0	0	0	0	0	0	0	0	0	0	0	1	0	1	1	0	0	0	0	0	0	0	0	1	1	0	0	0	0	0	0	0	0
PhP036	0	0	0	1	0	0	0	0	0	0	0	0	0	0	0	0	0	0	0	0	0	0	0	0	0	0	0	0	1	0	0	0	0	0	0	0	0	0	0	0	0	0	0	0	0	0	0	0	0
PhP037	0	0	0	0	0	0	0	0	0	0	0	0	0	0	0	0	0	0	0	0	0	0	0	0	0	0	0	0	0	0	1	0	0	0	1	0	0	0	0	1	0	0	0	0	0	0	0	0	0
PhP038	0	0	0	0	0	1	0	1	1	1	0	0	0	1	1	0	0	0	0	0	0	0	0	0	0	0	0	1	1	1	0	0	0	0	1	0	0	0	0	1	1	0	0	0	0	0	0	0	0
PhP039	0	0	0	0	0	0	0	0	1	0	0	0	0	1	0	0	0	0	0	0	0	0	0	0	0	0	0	0	0	0	0	0	0	0	1	0	0	0	0	1	1	0	0	0	0	0	0	0	0
PhP040	0	0	0	0	0	0	0	0	0	0	0	0	0	0	0	0	0	0	0	0	0	0	0	0	0	0	0	0	0	0	0	0	0	0	0	0	0	0	0	0	0	0	0	0	0	0	0	0	0
PhP041	0	0	0	0	0	0	0	0	1	1	0	0	0	1	1	0	0	0	0	0	0	0	0	0	0	0	0	0	0	0	0	0	0	0	1	0	0	0	0	1	0	0	0	0	0	0	0	0	0
PhP042	0	0	0	0	0	0	0	0	0	0	1	0	0	1	0	0	0	0	0	0	0	0	0	0	0	0	0	0	0	0	0	0	0	0	0	0	0	0	0	0	0	0	0	0	1	1	0	0	0
PhP043	0	0	0	0	0	1	0	1	1	0	0	0	0	1	1	0	0	0	1	1	1	0	0	0	0	1	1	1	0	0	0	0	0	0	0	0	0	0	0	1	1	0	0	0	0	0	0	0	0
PhP044	0	0	0	0	0	0	0	0	1	0	0	0	0	1	0	0	0	0	0	0	0	0	0	0	0	0	0	0	0	0	0	0	0	1	0	0	0	0	0	1	1	0	0	0	0	0	0	0	0
PhP045	0	0	0	0	0	1	0	0	1	0	0	0	0	0	0	0	0	0	0	0	0	0	0	0	0	0	0	0	0	0	0	0	0	1	0	0	0	0	0	0	0	0	0	0	0	0	0	0	0
PhP046	0	0	0	0	0	0	0	0	0	0	0	0	0	0	0	0	0	0	0	0	0	0	0	0	0	0	0	0	0	0	0	0	0	1	1	0	0	0	0	0	0	0	0	0	0	0	0	0	1
PhP047	0	0	0	0	0	0	0	0	0	0	0	0	0	0	0	0	0	0	0	0	0	0	0	0	0	0	0	0	0	0	0	1	0	0	0	0	0	0	0	0	0	0	0	0	0	0	0	0	0
PhP048	0	0	0	0	0	0	0	0	0	0	0	0	0	0	0	0	0	0	0	0	0	0	0	0	0	0	0	0	0	0	0	0	0	0	0	0	0	0	0	0	0	0	0	0	0	0	0	0	0
PhP049	0	0	0	0	0	0	0	0	0	0	0	0	0	0	0	0	0	0	1	0	0	0	0	0	0	0	0	1	0	0	0	0	0	0	0	0	0	0	0	1	1	0	0	0	0	0	0	0	0
PhP050	0	0	0	0	0	0	0	0	0	0	0	0	0	0	0	0	0	0	0	0	0	0	0	0	0	0	0	0	0	0	0	1	0	0	0	0	0	0	0	0	0	0	0	0	0	0	0	0	0
PhP051	0	0	0	0	0	0	0	0	0	0	0	0	0	0	0	0	0	0	0	0	0	0	0	0	0	0	0	0	0	0	0	0	0	1	0	0	0	0	0	0	1	0	0	0	0	0	0	0	0
PhP052	0	0	0	0	0	0	0	0	0	1	0	0	0	1	0	0	0	0	0	0	0	0	0	0	0	0	0	0	0	0	0	0	0	0	0	0	0	0	0	0	0	0	0	0	0	0	0	0	0
PhP053	1	0	0	0	0	1	0	1	1	0	0	0	0	1	0	0	0	0	0	0	0	0	0	0	0	0	0	1	0	0	0	0	0	0	0	0	0	0	0	1	0	0	0	0	0	0	0	0	0
PhP054	0	0	0	0	0	0	0	0	0	0	0	0	0	0	0	0	0	0	1	0	0	0	0	0	0	0	1	1	0	1	1	0	0	0	0	0	0	0	1	0	0	0	0	0	0	0	0	0	0
PhP055	0	0	0	0	0	0	0	0	0	0	0	0	0	1	0	0	0	0	0	0	0	0	0	0	0	0	0	0	0	0	0	0	0	0	0	0	0	0	0	0	0	0	0	0	0	0	0	0	0
PhP056	0	0	0	0	0	0	0	0	1	1	0	0	0	0	0	0	0	0	0	0	0	0	0	0	0	0	0	0	0	0	0	0	0	1	1	0	0	0	1	0	0	0	0	0	0	0	0	0	0
PhP057	0	0	0	0	0	0	0	0	0	0	0	0	0	0	0	0	0	0	0	0	0	0	0	0	0	0	0	1	0	1	0	0	0	0	0	0	0	0	0	0	1	0	0	0	0	0	0	0	0
PhP058	0	0	0	0	0	0	1	0	0	0	0	0	0	0	1	0	0	0	1	0	1	1	0	0	0	0	0	1	1	1	1	0	0	0	0	0	0	0	0	0	0	0	0	0	0	0	0	0	0
PhP059	0	0	0	0	0	0	0	0	0	0	0	0	0	0	0	0	0	0	1	0	0	0	0	0	0	0	0	1	0	1	1	0	0	0	0	0	0	0	0	1	0	0	0	0	0	0	0	0	0
PhP060	0	1	0	0	0	1	0	1	0	0	0	0	0	1	0	0	0	0	0	0	0	0	0	0	0	0	0	1	0	1	1	0	0	0	0	0	0	0	0	0	0	0	0	0	1	0	0	0	0
PhP061	0	0	0	0	0	0	0	0	0	0	0	0	0	0	0	0	0	0	0	0	0	0	0	0	0	0	0	1	0	0	0	0	0	1	0	0	0	0	0	0	0	0	0	0	0	0	0	0	0
PhP062	0	0	0	0	0	0	0	0	0	0	0	0	0	0	1	0	0	0	0	0	0	0	0	0	0	0	0	0	0	0	0	0	0	1	1	0	0	0	0	1	1	0	0	0	0	0	0	0	0
PhP063	0	0	0	0	0	0	0	0	1	0	0	0	0	1	0	0	0	0	0	0	0	0	0	0	0	0	0	0	0	0	0	0	0	1	0	0	0	0	0	0	0	0	0	0	0	0	0	0	0
PhP064	0	0	0	0	0	0	0	0	0	0	0	0	0	0	0	0	0	0	0	1	0	0	0	0	0	0	0	1	1	1	0	0	0	0	0	0	0	0	0	0	0	0	0	0	0	0	0	0	0
PhP065	0	0	1	0	0	0	0	0	0	0	0	0	0	0	0	0	0	0	0	0	0	0	0	0	0	0	0	0	0	0	0	0	0	0	0	0	0	0	0	0	0	0	0	0	0	0	0	0	0
PhP066	0	0	0	0	0	1	0	0	1	0	0	0	0	1	0	0	0	0	0	0	0	0	0	0	0	0	0	1	0	0	0	0	0	0	0	0	0	0	0	0	0	0	0	0	0	0	0	0	0
PhP067	0	0	0	0	0	0	0	1	0	0	0	0	0	1	1	0	0	0	0	1	0	0	0	0	0	1	1	1	1	1	1	0	0	0	0	0	0	0	0	1	0	0	0	0	0	0	0	0	0
PhP068	0	0	0	0	0	0	0	0	1	0	0	0	0	1	0	0	0	0	0	0	0	0	0	0	0	0	0	0	0	0	0	0	0	1	1	0	0	0	0	1	1	0	0	0	0	0	0	0	0
PhP069	0	0	0	0	0	0	0	0	0	0	0	0	0	0	0	1	0	0	0	0	0	0	0	0	0	0	0	0	0	0	0	1	0	0	0	0	0	0	0	0	0	0	0	0	0	0	0	0	0
PhP070	0	0	0	0	0	0	0	1	0	0	0	0	0	0	1	0	0	0	0	1	0	0	0	0	0	0	0	1	1	1	0	0	0	0	0	0	0	0	0	1	1	0	0	0	0	0	0	0	0
PhP071	0	1	0	0	0	0	0	1	0	0	0	0	0	1	1	0	0	0	1	1	0	0	0	0	0	0	0	1	0	1	0	0	0	0	0	0	0	0	0	0	0	0	0	0	0	0	0	0	0
PhP072	1	1	0	0	0	1	0	1	1	0	0	0	0	1	1	0	0	0	0	1	0	0	0	1	1	0	0	1	1	1	0	0	0	0	0	1	0	0	0	1	1	0	0	0	0	0	1	0	0
PhP073	0	0	0	0	0	0	0	0	0	0	0	0	0	0	0	0	0	0	0	0	0	0	0	0	0	0	0	0	0	0	0	0	0	1	0	0	0	0	0	1	1	0	0	0	0	0	0	0	0
PhP074	0	0	0	0	0	0	0	0	1	0	0	0	0	1	1	0	0	0	0	0	0	0	0	0	0	0	0	0	0	0	0	0	0	0	1	0	0	0	0	1	1	0	0	0	0	0	0	0	0
PhP075	0	0	0	0	0	0	0	0	0	0	0	0	0	0	0	1	0	0	0	0	0	0	0	0	0	0	0	0	0	0	0	0	0	0	0	0	0	0	0	0	1	0	0	0	0	0	0	0	0
PhP076	0	0	0	0	0	0	0	0	1	0	0	0	0	1	0	0	0	0	0	0	0	0	0	0	0	0	0	0	0	0	0	0	0	0	0	0	0	0	0	0	0	0	0	0	0	0	0	0	0
PhP077	0	0	0	0	0	0	0	0	0	0	0	0	0	0	0	0	0	0	0	0	0	0	0	0	0	0	0	1	0	1	1	0	0	0	0	0	0	0	0	1	0	0	0	0	0	0	0	0	0
PhP078	0	0	0	0	0	0	0	0	0	0	0	0	0	0	0	0	0	0	0	0	0	0	0	0	0	0	0	0	0	0	0	0	0	1	0	0	0	0	0	0	0	0	0	0	0	0	0	0	1
PhP079	0	0	0	0	0	0	0	0	0	0	0	0	0	1	1	0	0	0	0	0	0	0	0	0	0	0	0	0	0	0	0	0	0	0	1	0	0	0	0	1	1	0	0	0	0	0	0	0	0
PhP080	0	0	0	0	0	0	0	0	1	1	0	0	0	1	0	0	0	0	0	0	0	0	0	0	0	0	0	0	0	0	0	0	0	0	0	0	0	0	0	0	0	0	0	0	0	0	0	0	0
PhP081	0	0	0	0	0	0	0	0	0	0	0	0	0	0	0	0	0	0	0	0	0	0	0	0	0	0	0	0	1	0	1	0	0	0	0	0	0	0	0	1	0	0	0	0	0	0	0	0	0
PhP082	0	0	0	0	0	0	0	1	1	0	0	0	0	1	1	0	0	0	1	0	0	0	0	0	0	0	0	1	0	0	0	0	0	0	1	0	0	0	0	1	1	0	0	0	0	0	0	0	0
PhP083	0	0	0	0	0	0	0	0	1	0	0	0	0	1	0	0	0	0	0	0	0	0	0	0	0	0	0	0	0	0	0	0	0	1	0	0	0	0	0	0	0	0	0	0	0	0	0	0	0
PhP084	0	0	0	0	0	0	0	1	0	0	0	0	0	0	1	0	0	0	0	0	0	0	0	0	0	0	0	1	0	1	1	0	0	0	0	0	0	0	0	1	1	0	0	0	0	0	0	0	0
PhP085	0	0	0	0	0	0	0	0	0	0	0	0	0	0	0	1	0	0	0	0	0	0	0	0	0	0	0	0	0	0	0	1	0	0	0	0	0	0	0	0	0	0	0	0	0	0	0	0	0
PhP086	0	0	0	0	0	0	0	0	0	0	0	0	0	1	1	0	0	0	0	0	0	0	0	0	0	0	0	0	0	0	0	0	0	0	0	0	0	0	0	0	0	0	0	0	0	0	0	0	0
PhP087	0	0	0	0	0	1	0	0	0	1	0	0	0	1	1	0	0	0	0	0	0	0	0	0	0	0	0	1	1	1	0	0	0	0	0	0	0	0	0	1	1	0	0	0	0	0	0	0	0
PhP088	0	0	0	0	0	0	0	0	0	0	0	0	0	0	0	0	0	0	0	0	0	0	0	0	0	0	0	1	0	1	0	0	0	0	0	0	0	0	0	0	0	0	0	0	0	0	0	0	0
PhP089	0	0	0	0	0	0	0	0	0	0	0	0	0	1	1	0	0	0	0	0	0	0	0	0	0	0	0	0	0	0	0	0	0	1	0	0	0	0	0	0	0	0	0	0	0	0	0	0	0
PhP090	0	0	0	0	0	1	0	0	1	0	0	0	0	1	0	0	0	0	0	0	0	0	0	0	0	0	0	1	0	0	0	0	0	0	1	0	0	0	0	0	0	0	0	0	0	0	0	0	0
PhP091	0	0	0	0	0	0	0	0	0	0	0	0	0	0	0	0	0	0	0	0	0	0	0	0	0	0	0	0	0	0	0	0	0	0	1	0	0	0	0	0	0	0	0	0	0	0	0	0	0
PhP092	0	0	0	0	0	0	0	0	0	0	0	0	0	0	0	0	0	0	0	0	0	0	0	0	0	0	0	0	0	0	0	0	0	1	1	0	0	0	0	0	0	0	0	0	0	0	0	0	0
PhP093	0	0	0	0	0	1	0	0	1	0	0	0	0	1	0	0	0	0	0	0	0	0	0	0	0	0	0	1	0	0	0	0	0	0	0	0	0	0	0	0	0	0	0	0	0	0	0	0	0
PhP094	0	0	0	0	0	0	0	0	0	0	0	0	0	0	0	0	0	0	1	1	0	0	0	0	0	0	0	0	0	1	1	1	0	0	0	0	0	0	0	0	0	0	0	0	0	0	0	0	0
PhP095	0	0	0	0	0	0	0	1	1	0	0	0	0	1	1	0	0	0	0	0	0	0	0	0	0	0	0	1	0	0	0	0	0	1	1	0	0	0	0	1	1	0	0	0	0	0	0	0	0
PhP096	0	0	0	0	0	0	0	0	0	0	0	0	0	0	0	0	0	0	0	0	0	0	0	0	0	0	0	0	0	0	0	0	0	0	1	0	0	0	1	0	0	0	0	0	0	0	0	0	0
PhP097	0	0	1	0	0	0	0	0	0	0	0	0	0	0	0	0	0	0	0	0	0	0	0	0	0	0	0	0	0	0	0	1	0	0	0	0	0	0	0	0	0	0	0	0	0	0	0	0	0
PhP098	0	0	0	0	0	0	0	0	0	0	0	0	0	0	1	0	0	0	0	0	0	0	0	0	0	0	0	0	1	0	1	0	0	0	0	0	0	0	0	1	1	0	0	0	0	0	0	0	0
PhP099	0	0	0	0	0	1	0	0	1	1	0	0	0	0	0	0	0	0	0	0	0	0	0	0	0	0	0	0	0	1	0	0	0	0	1	0	0	0	0	1	0	0	0	0	0	0	0	0	0
PhP100	0	0	0	0	0	0	0	0	0	0	0	0	0	0	0	0	0	0	0	0	0	0	0	0	0	1	1	0	0	0	0	0	0	0	0	0	0	0	0	0	0	0	0	0	0	0	0	0	0
[truncated: 71 more columns]

## Sheet: PhP - images
Title	SMILES – core fragment	SMILES – amine	SMILES – PhP	Structure – core fragment	Structure – amine	Structure – PhP
PhP001	CCCc1ccc(O)c(O)c1	NC(C)Cc1ccc(O)c(O)c1	N1=NC1(C)CCC(=O)NC(C)Cc2ccc(O)c(O)c2
PhP002	CCOC(=O)c(cs1)c(c12)CCN(C2)Cc3ccccc3	Nc1sc2c(c1C(=O)OCC)CCN(Cc1ccccc1)C2	N1=NC1(C)CCC(=O)Nc(s2)c(C(=O)OCC)c(c23)CCN(C3)Cc4ccccc4
PhP003	CCc1nccn1C	NCCc1nccn1C	Cn1ccnc1CCNC(=O)CCC2(C)N=N2
PhP004	c1cc(C)cc(c12)c(C)c([nH]2)C	NCc1ccc2[nH]c(C)c(C)c2c1	Cc([nH]1)c(C)c(c12)cc(cc2)CNC(=O)CCC3(C)N=N3
PhP005	CCOC(=O)Cc1ccccc1	NC(C(=O)OCC)c1ccccc1	c1ccccc1[C@H](C(=O)OCC)NC(=O)CCC2(C)N=N2
PhP006	CCc1nc(cs1)-c2ccc(OC)cc2	NCCc1nc(-c2ccc(OC)cc2)cs1	COc1ccc(cc1)-c2csc(n2)CCNC(=O)CCC3(C)N=N3
PhP007	c1cccc(c12)N(C)C(=O)CO2	Nc1ccc2c(c1)N(C)C(=O)CO2	O1CC(=O)N(C)c(c12)cc(cc2)NC(=O)CCC3(C)N=N3
PhP008	c1ncc(C)c(c12)cccc2	NCc1cncc2ccccc12	N1=NC1(C)CCC(=O)NCc(cnc2)c(c23)cccc3
PhP009	Cc1nc[nH]c1C	NCc1nc[nH]c1C	Cc1[nH]cnc1CNC(=O)CCC2(C)N=N2
PhP010	Cc1ccc(cc1)N2CCC(CO)CC2	NCc1ccc(N2CCC(CO)CC2)cc1	N1=NC1(C)CCC(=O)NCc2ccc(cc2)N3CCC(CO)CC3
PhP011	c1scnc1-c2c[nH]c(c2)C(=O)N	Nc1nc(-c2c[nH]c(C(N)=O)c2)cs1	N1=NC1(C)CCC(=O)Nc2nc(cs2)-c3c[nH]c(c3)C(=O)N
PhP012	C1CCCCN1c2ccc(F)cc2	NC1CCN(c2ccc(F)cc2)CC1	N1=NC1(C)CCC(=O)NC2CCN(CC2)c3ccc(F)cc3
PhP013	CCCc1cccc(c1)OCc2ccccc2	NC(C)Cc1cccc(OCc2ccccc2)c1	N1=NC1(C)CCC(=O)NC(C)Cc2cccc(c2)OCc3ccccc3
PhP014	COC(=O)CCc(c[nH]1)c(c12)cccc2	NC(Cc1c[nH]c2ccccc12)C(=O)OC	N1=NC1(C)CCC(=O)NC(C(=O)OC)Cc(c[nH]2)c(c23)cccc3
PhP015	C1CCCCC1NC(=O)OC(C)(C)C	NC1CCCC(NC(=O)OC(C)(C)C)C1	CC(C)(C)OC(=O)NC1CCCC(C1)NC(=O)CCC2(C)N=N2
PhP016	C1CCCn(c12)cc(n2)C(C)(C)C	NC1CCc2nc(C(C)(C)C)cn2C1	CC(C)(C)c(c1)nc(n12)CCC(C2)NC(=O)CCC3(C)N=N3
PhP017	c1cccc(c12)nc(C)n2-c3ccccc3	Nc1ccc2c(c1)nc(C)n2-c1ccccc1	c1ccccc1-n(c(n2)C)c(c23)ccc(c3)NC(=O)CCC4(C)N=N4
PhP018	C1CCCCN1S(=O)(=O)c2ccc(OC)cc2	NC1CCN([S@SP1](=O)(=O)c2ccc(OC)cc2)CC1	COc1ccc(cc1)S(=O)(=O)N2CCC(CC2)NC(=O)CCC3(C)N=N3
PhP019	COC(=O)Cc1ccc(C)cc1	NC(C(=O)OC)c1ccc(C)cc1	c1cc(C)ccc1C(C(=O)OC)NC(=O)CCC2(C)N=N2
PhP020	CCc(n1)n(C)c(c12)cccc2	NCCc1nc2ccccc2n1C	c1cccc(c12)n(C)c(n2)CCNC(=O)CCC3(C)N=N3
PhP021	Cc1cn(C)nc1C	NCc1cn(C)nc1C	Cc1nn(C)cc1CNC(=O)CCC2(C)N=N2
PhP022	CCCCN1CCOCC1	NCCCCN1CCOCC1	N1=NC1(C)CCC(=O)NCCCCN2CCOCC2
PhP023	Cc(n1)[nH]c(c12)c(C)ccc2	NCc1nc2cccc(C)c2[nH]1	c1ccc(C)c(c12)[nH]c(n2)CNC(=O)CCC3(C)N=N3
PhP024	Cc1cccc(c1)C(=O)OC(C)(C)C	NCc1cccc(C(=O)OC(C)(C)C)c1	CC(C)(C)OC(=O)c1cccc(c1)CNC(=O)CCC2(C)N=N2
PhP025	C1CCCCn(c12)c(=O)[nH]n2	NC1CCc2n[nH]c(=O)n2CC1	N1=NC1(C)CCC(=O)NC(CC2)CCn(c23)c(=O)[nH]n3
PhP026	n1ccccc1Cc2ccc(C)cc2	NC(c1ccc(C)cc1)c1ccccn1	n1ccccc1C(c(cc2)ccc2C)NC(=O)CCC3(C)N=N3
PhP027	CCNC(=O)c1ccc(Cl)cc1	NCCNC(=O)c1ccc(Cl)cc1	N1=NC1(C)CCC(=O)NCCNC(=O)c2ccc(Cl)cc2
PhP028	Cc1ccccc1O	NCc1ccccc1O	N1=NC1(C)CCC(=O)NCc2ccccc2O
PhP029	C1CCCCN1c2ncc[nH]c2=O	NC1CCCN(c2ncc[nH]c2=O)C1	N1=NC1(C)CCC(=O)NC2CCCN(C2)c3ncc[nH]c3=O
PhP030	Cc(n1)[nH]c(c12)ccc(c2)C	NCc1nc2cc(C)ccc2[nH]1	c1cc(C)cc(c12)nc([nH]2)CNC(=O)CCC3(C)N=N3
PhP031	CCc(n1)[nH]c(c12)cccc2	NCCc1nc2ccccc2[nH]1	N1=NC1(C)CCC(=O)NCCc(n2)[nH]c(c23)cccc3
PhP032	CCCc1ccccc1OC	NC(CC)c1ccccc1OC	N1=NC1(C)CCC(=O)NC(CC)c2ccccc2OC
PhP033	Cc1ccc(cc1)-n2ccnc2	NCc1ccc(-n2ccnc2)cc1	N1=NC1(C)CCC(=O)NCc2ccc(cc2)-n3ccnc3
PhP034	c1cccc(c12)c(CC)ccc2OC	NCCc1ccc(OC)c2ccccc12	c1cccc(c12)c(OC)ccc2CCNC(=O)CCC3(C)N=N3
PhP035	CCNS(=O)(=O)c1cccc([N+](=O)[O-])c1	NCCN[S@SP3](=O)(=O)c1cccc([N+](=O)[O-])c1	N1=NC1(C)CCC(=O)NCCNS(=O)(=O)c2cccc(c2)N(=O)=O
PhP036	COC(=O)CCc(c[nH]1)c(c12)cccc2	NC(Cc1c[nH]c2ccccc12)C(=O)OC	N1=NC1(C)CCC(=O)N[C@@H](C(=O)OC)Cc(c[nH]2)c(c23)cccc3
PhP037	Cc1ncc([nH]1)-c2cccc(C)c2	NCc1ncc(-c2cccc(C)c2)[nH]1	Cc1cccc(c1)-c2cnc([nH]2)CNC(=O)CCC3(C)N=N3
PhP038	CCC(O)c1cc(OC)ccc1OC	NC(C)C(O)c1cc(OC)ccc1OC	COc1ccc(OC)c(c1)C(O)C(C)NC(=O)CCC2(C)N=N2
PhP039	Cc1ccc(OC)nc1	NCc1ccc(OC)nc1	COc1ccc(cn1)CNC(=O)CCC2(C)N=N2
PhP040	Cc(c1)[nH]c(c12)cccc2	NCc1cc2ccccc2[nH]1	N1=NC1(C)CCC(=O)NCc(c2)[nH]c(c23)cccc3
PhP041	Cc(n1)ncc(c12)cnn2-c3ccc(F)cc3	Nc1nc(C)nc2c1cnn2-c1ccc(F)cc1	c1cc(F)ccc1-n(nc2)c(c23)nc(C)nc3NC(=O)CCC4(C)N=N4
PhP042	c1ccccc1-n2cnnn2	Nc1cccc(-n2cnnn2)c1	N1=NC1(C)CCC(=O)Nc2cccc(c2)-n3cnnn3
PhP043	[nH]1nccc1-c2nccn2C	Nc1cc(-c2nccn2C)[nH]n1	Cn1ccnc1-c2cc(n[nH]2)NC(=O)CCC3(C)N=N3
PhP044	CCOc1ccccc1OC	NCCOc1ccccc1OC	COc1ccccc1OCCNC(=O)CCC2(C)N=N2
PhP045	CC(C)(C)NS(=O)(=O)C	NCC(C)(C)N[S@SP2](C)(=O)=O	CS(=O)(=O)NC(C)(C)CNC(=O)CCC1(C)N=N1
PhP046	CC1CN(CCO1)CC(C)C	NCC1CN(CC(C)C)CCO1	CC(C)CN1CCOC(C1)CNC(=O)CCC2(C)N=N2
PhP047	C1CCCn(c12)ccn2	NC1CCc2nccn2C1	N1=NC1(C)CCC(=O)NC(CC2)Cn(c23)ccn3
PhP048	CCCN(CC)c1ccccc1	NCCCN(CC)c1ccccc1	c1ccccc1N(CC)CCCNC(=O)CCC2(C)N=N2
PhP049	s1cc(C(=O)N)c(c12)CCC(C2)C(C)(C)C	Nc1sc2c(c1C(N)=O)CCC(C(C)(C)C)C2	CC(C)(C)C(CC1)Cc(c12)sc(c2C(=O)N)NC(=O)CCC3(C)N=N3
PhP050	CCCn1ccnc1	NCCCn1ccnc1	N1=NC1(C)CCC(=O)NCCCn2ccnc2
PhP051	CCSCc1ccccc1	NCCSCc1ccccc1	N1=NC1(C)CCC(=O)NCCSCc2ccccc2
PhP052	Cc1ccc(cc1)-c2cncnc2	NCc1ccc(-c2cncnc2)cc1	N1=NC1(C)CCC(=O)NCc2ccc(cc2)-c3cncnc3
PhP053	Cc(n1)[nH]c(c12)cccn2	NCc1nc2ncccc2[nH]1	N1=NC1(C)CCC(=O)NCc(n2)[nH]c(c23)cccn3
PhP054	NC(=O)c(c1)cccc1N2CCCCC2	Nc1ccc(N2CCCCC2)cc1C(N)=O	N1=NC1(C)CCC(=O)Nc2ccc(cc2C(=O)N)N3CCCCC3
PhP055	c1cccc(c12)oc(n2)CN(C)C	Nc1ccc2nc(CN(C)C)oc2c1	CN(C)Cc(n1)oc(c12)cc(cc2)NC(=O)CCC3(C)N=N3
PhP056	CCCN1CCN(CC1)C(=O)OC(C)(C)C	NCCCN1CCN(C(=O)OC(C)(C)C)CC1	CC(C)(C)OC(=O)N1CCN(CC1)CCCNC(=O)CCC2(C)N=N2
PhP057	c1cc(O)c(C)c(c12)cccc2	NCc1c(O)ccc2ccccc12	N1=NC1(C)CCC(=O)NCc(c(O)cc2)c(c23)cccc3
PhP058	NC(=O)CCc1ccc(O)cc1	NC(Cc1ccc(O)cc1)C(N)=O	N1=NC1(C)CCC(=O)N[C@H](C(=O)N)Cc2ccc(O)cc2
PhP059	Cc1cccc(c1)C(=O)N	NCc1cccc(C(N)=O)c1	N1=NC1(C)CCC(=O)NCc2cccc(c2)C(=O)N
PhP060	c1ccccc1-c2ncccc2O	Nc1ccc(-c2ncccc2O)cc1	N1=NC1(C)CCC(=O)Nc2ccc(cc2)-c3ncccc3O
PhP061	CCc1c(C)n[nH]c1C	NCCc1c(C)n[nH]c1C	Cc1n[nH]c(C)c1CCNC(=O)CCC2(C)N=N2
PhP062	CCc1cc(OC)ccc1OC	NC(C)c1cc(OC)ccc1OC	COc1ccc(OC)c(c1)C(C)NC(=O)CCC2(C)N=N2
PhP063	CCc1nncn1C	NCCc1nncn1C	Cn1cnnc1CCNC(=O)CCC2(C)N=N2
PhP064	OCCCc(c[nH]1)c(c12)cccc2	NC(CO)Cc1c[nH]c2ccccc12	N1=NC1(C)CCC(=O)NC(CO)Cc(c[nH]2)c(c23)cccc3
PhP065	CCSc(c(C)[nH]1)c(c12)cccc2	NCCSc1c(C)[nH]c2ccccc12	c1cccc(c12)c(c(C)[nH]2)SCCNC(=O)CCC3(C)N=N3
PhP066	CCCc1nc[nH]n1	NCCCc1nc[nH]n1	N1=NC1(C)CCC(=O)NCCCc2nc[nH]n2
PhP067	CC(O)Cn(cn1)c(c12)cc(C)c(c2)C	NCC(O)Cn1cnc2cc(C)c(C)cc21	Cc(c1)c(C)cc(c12)n(cn2)CC(O)CNC(=O)CCC3(C)N=N3
PhP068	Cc1c(C)cc(C)nc1OC	NCc1c(C)cc(C)nc1OC	COc1nc(C)cc(C)c1CNC(=O)CCC2(C)N=N2
PhP069	CCCc(n1)[nH]c(c12)cccc2	NCCCc1nc2ccccc2[nH]1	N1=NC1(C)CCC(=O)NCCCc(n2)[nH]c(c23)cccc3
PhP070	CCC(O)c1cccc(O)c1	NC(C)C(O)c1cccc(O)c1	Oc(c1)cccc1[C@H](O)[C@@H](C)NC(=O)CCC2(C)N=N2
PhP071	O=c([nH]1)[nH]c(=O)c(c12)cccc2	Nn1c(=O)[nH]c2ccccc2c1=O	N1=NC1(C)CCC(=O)Nn(c(=O)[nH]2)c(=O)c(c23)cccc3
PhP072	Cc1c(CO)cnc(C)c1O	NCc1c(CO)cnc(C)c1O	Cc1ncc(CO)c(c1O)CNC(=O)CCC2(C)N=N2
PhP073	CCn(c(n1)C)c(c12)cccc2	NCCn1c(C)nc2ccccc21	c1cccc(c12)n(c(n2)C)CCNC(=O)CCC3(C)N=N3
PhP074	Cc1ncnc(c1)OC	Nc1nc(C)cc(OC)n1	COc1cc(C)nc(n1)NC(=O)CCC2(C)N=N2
PhP075	c1cccc(c12)NC(=O)CC2	Nc1ccc2c(c1)NC(=O)CC2	N1=NC1(C)CCC(=O)Nc(cc2)cc(c23)NC(=O)CC3
PhP076	n1c(C)nccc1CC	Nc1cc(CC)nc(C)n1	CCc1cc(nc(n1)C)NC(=O)CCC2(C)N=N2
PhP077	Cc1cccc(c1)-n2c(C)c[nH]c2=O	NCc1cccc(-n2c(C)c[nH]c2=O)c1	Cc1c[nH]c(=O)n1-c2cccc(c2)CNC(=O)CCC3(C)N=N3
PhP078	c1ccccc1CN2CC(C)OC(C)C2	Nc1ccccc1CN1CC(C)OC(C)C1	CC1CN(CC(O1)C)Cc2ccccc2NC(=O)CCC3(C)N=N3
PhP079	Fc(c1)cccc1CCCN(C2=O)C(=O)c(c23)cccc3	NC(Cc1cccc(F)c1)CN1C(=O)c2ccccc2C1=O	Fc(c1)cccc1C[C@H](NC(=O)CCC2(C)N=N2)CN(C3=O)C(=O)c(c34)cccc4
PhP080	Cc1ccc(cc1)-c2c(C)noc2C	NCc1ccc(-c2c(C)noc2C)cc1	Cc1noc(C)c1-c2ccc(cc2)CNC(=O)CCC3(C)N=N3
PhP081	CCc(c[nH]1)c(c12)cc(cc2)OCc3ccccc3	NCCc1c[nH]c2ccc(OCc3ccccc3)cc12	N1=NC1(C)CCC(=O)NCCc(c[nH]2)c(c23)cc(cc3)OCc4ccccc4
PhP082	n1n(C)c(C(=O)N)cc1CCC	Nc1c(CCC)nn(C)c1C(N)=O	CCCc1nn(C)c(C(=O)N)c1NC(=O)CCC2(C)N=N2
PhP083	n1nc(C)n(c12)CCC2	NCc1nnc2n1CCC2	N1=NC1(C)CCC(=O)NCc(nn2)n(c23)CCC3
PhP084	CCNC(=O)c1ccncc1	NCCNC(=O)c1ccncc1	N1=NC1(C)CCC(=O)NCCNC(=O)c2ccncc2
PhP085	C1CCCc(c12)nc[nH]2	NC1CCc2[nH]cnc2C1	N1=NC1(C)CCC(=O)NC(CC2)Cc(c23)nc[nH]3
PhP086	c1ccccc1COC(=O)CCOCc2ccccc2	NC(COCc1ccccc1)C(=O)OCc1ccccc1	c1ccccc1COC(=O)C(NC(=O)CCC2(C)N=N2)COCc3ccccc3
PhP087	c1ccccc1S(=O)(=O)Nc2ccc(OC)cc2	Nc1cccc([S@SP1](=O)(=O)Nc2ccc(OC)cc2)c1	COc1ccc(cc1)NS(=O)(=O)c2cccc(c2)NC(=O)CCC3(C)N=N3
PhP088	Cc1ccc(cc1)-c2ccc(O)cc2	NCc1ccc(-c2ccc(O)cc2)cc1	N1=NC1(C)CCC(=O)NCc2ccc(cc2)-c3ccc(O)cc3
PhP089	o1cccc1C(C)N2CCOCC2	NCC(c1ccco1)N1CCOCC1	N1=NC1(C)CCC(=O)NCC(c2ccco2)N3CCOCC3
PhP090	CCc1nnc(C)[nH]1	NC(C)c1nnc(C)[nH]1	Cc([nH]1)nnc1C(C)NC(=O)CCC2(C)N=N2
PhP091	CCc1cn(C)cn1	NCCc1cn(C)cn1	Cn1cnc(c1)CCNC(=O)CCC2(C)N=N2
PhP092	CCc1nc(C)c(s1)C	NCCc1nc(C)c(C)s1	Cc1nc(sc1C)CCNC(=O)CCC2(C)N=N2
PhP093	Cc1nnc(C)[nH]1	NCc1nnc(C)[nH]1	Cc1nnc([nH]1)CNC(=O)CCC2(C)N=N2
PhP094	CCNC(=O)Nc1ccccc1	NCCNC(=O)Nc1ccccc1	N1=NC1(C)CCC(=O)NCCNC(=O)Nc2ccccc2
PhP095	CCNC(=O)c1ccnn1C	NCCNC(=O)c1ccnn1C	Cn1nccc1C(=O)NCCNC(=O)CCC2(C)N=N2
PhP096	CCN1CCN(CC1)c2ccc(C(F)(F)F)cn2	NCCN1CCN(c2ccc(C(F)(F)F)cn2)CC1	N1=NC1(C)CCC(=O)NCCN2CCN(CC2)c3ccc(cn3)C(F)(F)F
PhP097	CCc1csc(n1)-c2ccccc2	NCCc1csc(-c2ccccc2)n1	N1=NC1(C)CCC(=O)NCCc2csc(n2)-c3ccccc3
PhP098	Cc1ncc([nH]1)-c2ccc(OC)cc2	NCc1ncc(-c2ccc(OC)cc2)[nH]1	COc1ccc(cc1)-c2cnc([nH]2)CNC(=O)CCC3(C)N=N3
PhP099	Cc1ccc(cc1)CNC(=O)OC(C)(C)C	NCc1ccc(CNC(=O)OC(C)(C)C)cc1	CC(C)(C)OC(=O)NCc1ccc(cc1)CNC(=O)CCC2(C)N=N2
PhP100	c1ccccc1NC(=O)CN(C)C	Nc1cccc(NC(=O)CN(C)C)c1	CN(C)CC(=O)Nc1cccc(c1)NC(=O)CCC2(C)N=N2

## Sheet: Crystallographic data
Compound
PDB ID	8Q34
Data collection
Space group	P1
Cell dimensions
a, b, c (Å)	37.24 44.09 78.48
α, β, γ (°)	90.03 90.00 90.03
Resolution (Å)	78.48-1.48 (1.51-1.48)
Rmerge	0.14 (1.31)
I / σI	5.7 (0.8)
Completeness (%)	90.9 (51.3)
Redundancy	3.4 (3.0)
Refinement
Resolution (Å)	1.48
No. reflections	259312
Rwork / Rfree	0.184 / 0.216
No. atoms	9429
Protein	8457
Ligand	168
Water	804
B-factors
Protein	16
Ligand	14
Water	26.41
R.m.s. deviations
Bond lengths (Å)	0.0068
Bond angles (°)	2.905
*Diffraction data from single crystal was used to determine the structure. Values in parentheses are for highest-resolution shell.
